# Supplementary material for: The Association between Gut Microbiome and Pregnancy-Induced Hypertension: A Nested Case–Control Study
Source: MDPI journal article supplement (doi:10.3390/nu14214582), 2022-11-01
Supplement: s1 [file s1]

**Table S1.** Basic characteristics of subjects in PE and GH group.

| Variable                 | Control (n=35) | Case       |                          |
|--------------------------|----------------|------------|--------------------------|
|                          |                | GH (n=20)  | PE (n=15)                |
| Age (year)               | 31.26±3.94     | 29.95±3.53 | 33.73±4.01 <sup>#*</sup> |
| Gestational age (week)   | 12.70±0.86     | 13.49±4.28 | 12.69±0.80               |
| Race                     |                |            |                          |
| Han                      | 33(94.3%)      | 19(95.0%)  | 15(100.0%)               |
| Others                   | 2(5.7%)        | 1(5.0%)    | 0(0.0%)                  |
| Occupation               |                |            |                          |
| Professionals            | 9(25.7%)       | 6(30.0%)   | 2(13.3%)                 |
| Company employee         | 14(40.0%)      | 10(50.0%)  | 5(33.3%)                 |
| Others                   | 12(34.3%)      | 4(20.0%)   | 8(53.3%)                 |
| Education                |                |            |                          |
| Junior college and below | 18(51.4%)      | 7(35.0%)   | 7(46.7%)                 |
| Undergraduate and above  | 17(48.6%)      | 13(65.0%)  | 8(53.3%)                 |
| Monthly income           |                |            |                          |
| 10000 and below          | 18(51.4%)      | 10(50.0%)  | 12(80.0%)                |
| 10000 and above          | 17(48.6%)      | 10(50.0%)  | 3(20.0%)                 |

#: Means there was statistics difference between GH and PE group ( $p < 0.05$ ).

\*: Means there was statistics difference between subgroup and control group ( $p < 0.05$ ).

**Table S2.** Clinical characteristics of subjects in PE and GH group.

| Variable                       | Control (n=35) | Case                     |                           |
|--------------------------------|----------------|--------------------------|---------------------------|
|                                |                | GH (n=20)                | PE (n=15)                 |
| Early waist (cm)               | 79.47±7.01     | 80.49±7.56               | 84.65±10.58               |
| Early BMI (kg/m <sup>2</sup> ) | 21.80±2.20     | 22.49±3.48               | 24.32±3.49 <sup>*</sup>   |
| Early SBP (mmHg)               | 114.77±9.54    | 124.95±7.55 <sup>*</sup> | 125.20±8.43 <sup>*</sup>  |
| Early DBP (mmHg)               | 73.49±8.46     | 80.65±7.10 <sup>*</sup>  | 83.20±7.50 <sup>*</sup>   |
| HGB (g/L)                      | 122.71±10.51   | 127.78±6.89              | 127.37±7.98               |
| GLU (mmol/L)                   | 4.52±0.39      | 4.68±0.55                | 4.76±0.34                 |
| ALB (g/L)                      | 45.84±2.26     | 45.48±2.16               | 44.33±2.79                |
| ALT (U/L)                      | 17.57±10.54    | 21.08±18.48              | 24.95±13.07               |
| AST (U/L)                      | 18.46±5.48     | 20.24±7.99               | 22.82±8.40                |
| CREA (umol/L)                  | 43.23±8.16     | 43.15±6.28               | 45.35±8.83                |
| UA (umol/L)                    | 197.89±38.93   | 219.35±50.49             | 245.64±56.72 <sup>*</sup> |
| UREA (mmol/L)                  | 2.50±0.55      | 2.66±0.90                | 2.56±0.59                 |
| TG (mmol/L)                    | 1.42±0.40      | 1.48±0.64                | 1.92±0.60 <sup>*</sup>    |
| TCHOL (mmol/L)                 | 4.74±0.86      | 4.85±0.89                | 4.27±0.82                 |
| HDLCH (mmol/L)                 | 1.89±0.39      | 2.06±0.41                | 1.68±0.38                 |
| LDLCH (mmol/L)                 | 2.74±0.78      | 2.69±0.82                | 2.35±0.47                 |
| hsCRP (mg/L)                   | 3.86±4.20      | 3.92±2.86                | 6.32±6.80                 |
| INS (mU/L)                     | 19.19±31.74    | 36.88±46.85              | 56.49±74.45 <sup>*</sup>  |
| GGT (U/L)                      | 13.57±5.79     | 19.62±17.59              | 25.86±15.88 <sup>*</sup>  |

\*: Means there was statistics difference between subgroup and control group ( $p < 0.05$ ).

BMI, body mass index; SBP, systolic blood pressure; DBP, diastolic blood pressure; HGB, hemoglobin; ALB, albumin; ALT, glutamic pyruvic transaminase; AST, glutamic oxalacetic transaminase; CREA, creatinine; UA, uric acid; TG, triglyceride; TCHOL, total cholesterol; HDLCH, high density lipoprotein cholesterol; LDLCH, low density lipoprotein cholesterol; hsCRP, hypersensitive C-reactive protein; INS, insulin; GGT, glutamyltransferase.

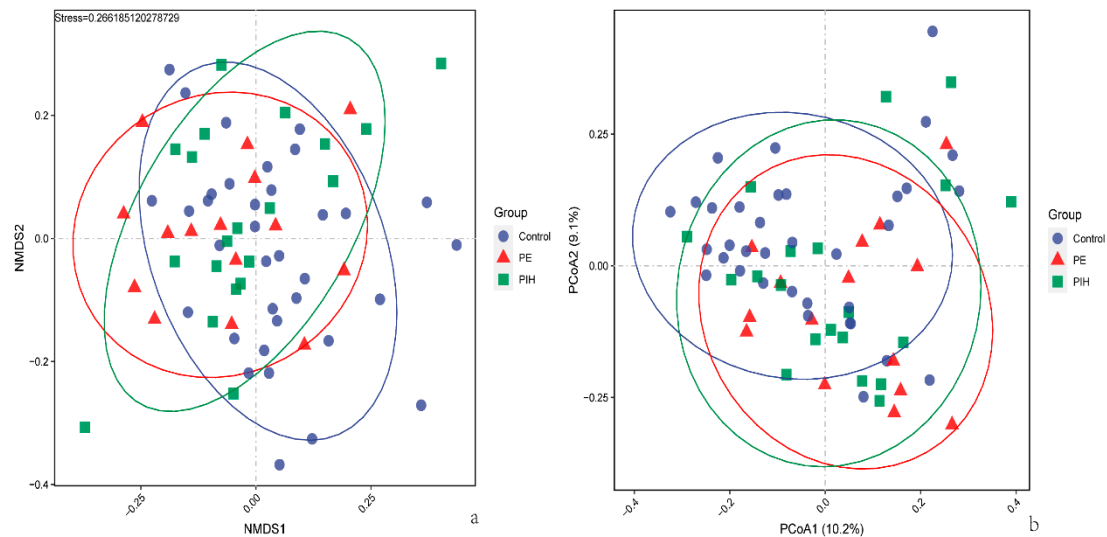

**Figure S1.** The beta diversity of subgroup and healthy controls. (a) NMDS analysis in three groups. (b) PCoA analysis in three groups.

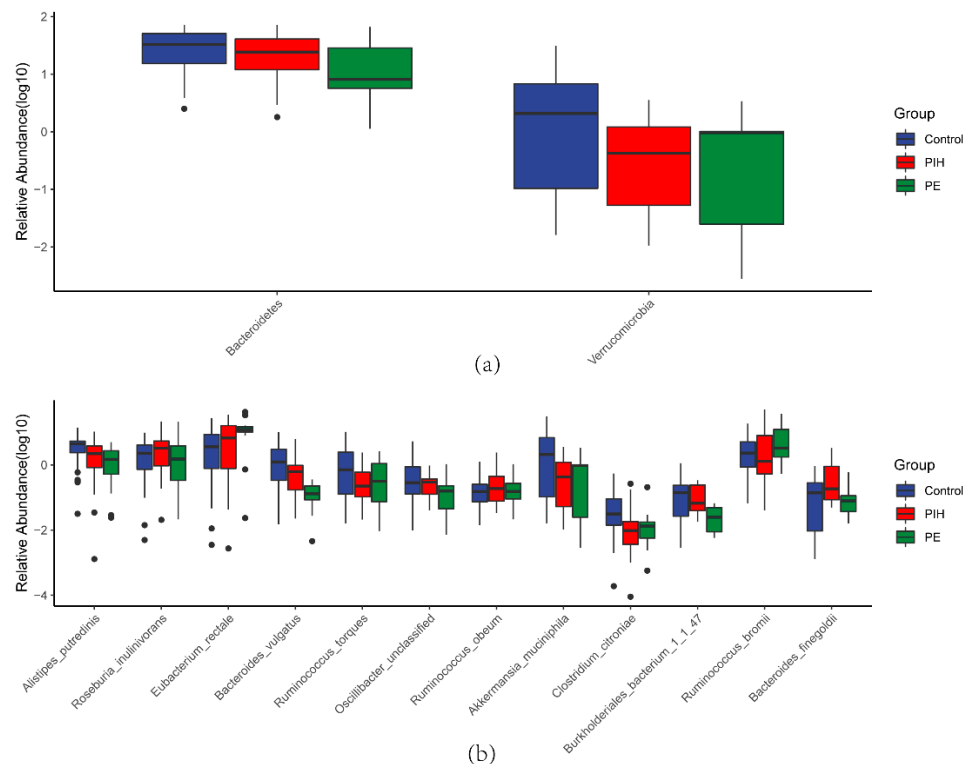

**Figure S2.** Boxplot of different microbial taxa. (A) Different phylum level taxa in three groups. (B) Different species level taxa in three groups.

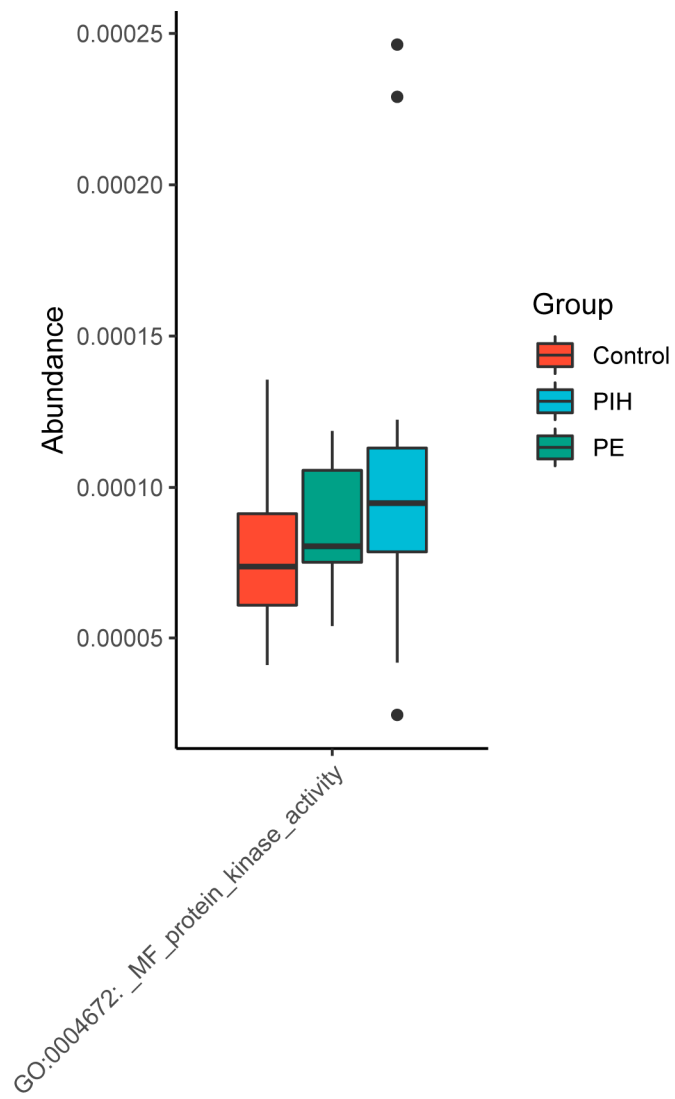

**Figure S3.** Boxplot of different function modules in three groups.

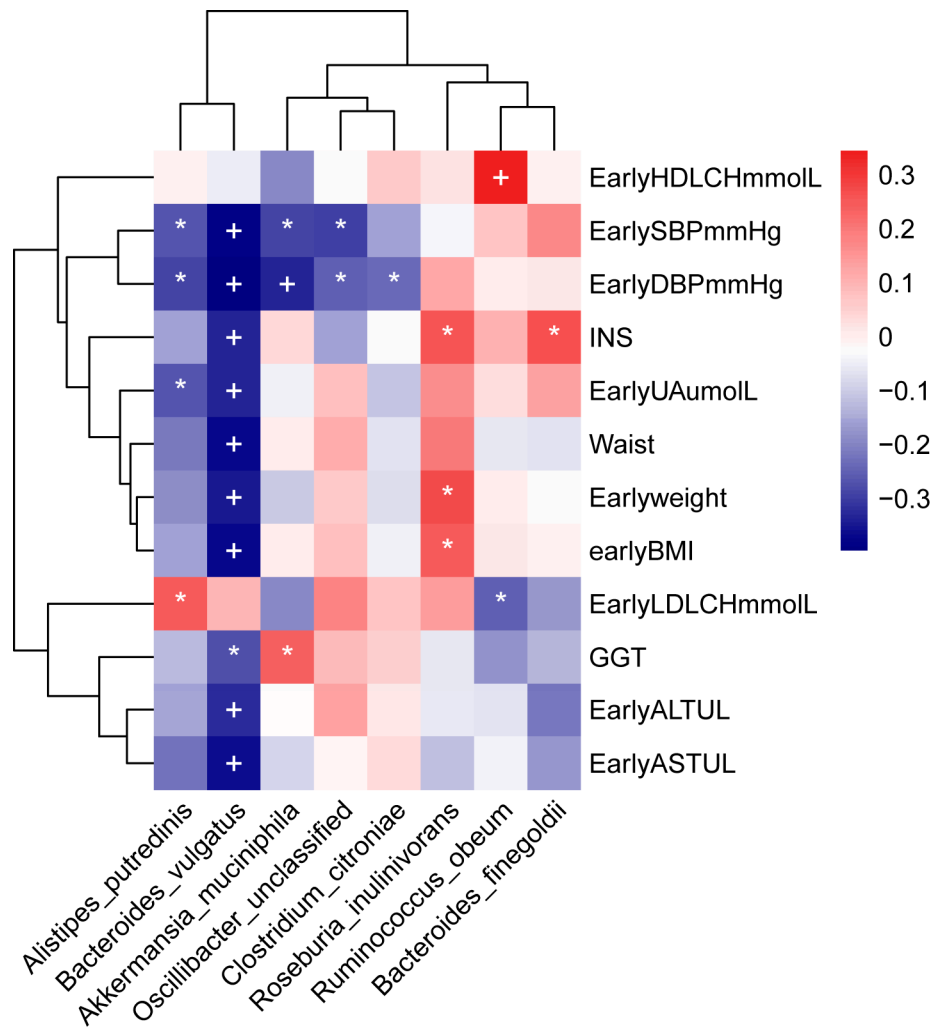

**Figure S4.** Heatmap of Spearman correlation between different species and clinical indices between three groups. Positive correlations are indicated in red text and negative correlations are indicated in blue text. (\*  $p < 0.05$ ; +  $p < 0.01$ )

HDLCH, high density lipoprotein cholesterol; SBP, systolic blood pressure; DBP, diastolic blood pressure; INS, insulin; UA, uric acid; BMI, body mass index; LDLCH, low density lipoprotein cholesterol; GGT, glutamyltransferase; AST, glutamic oxalacetic transaminase; ALT, glutamic pyruvic transaminase.

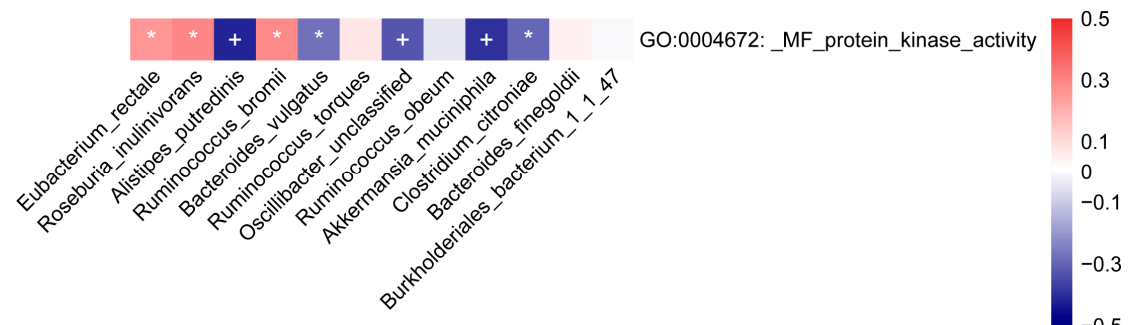

**Figure S5.** Heatmap of Spearman correlation between different species and function modules between three groups. Positive correlations are indicated in red text and negative correlations are indicated in blue text. (\*  $p < 0.05$ ; +  $p < 0.01$ )
